# Supplementary material for: Sperm Quality Affected by Naturally Occurring Chemical Elements in Bull Seminal Plasma
Source: MDPI journal article supplement (doi:10.3390/antiox11091796), 2022-09-12
Supplement: s1 [file s1]

Supplementary Materials

**Table S1.** Correlations: spermatozoa parameters vs markers of OS, biochemical parameters, and chemical elements.

|      |   | Al    | Ba    | Ca    | Cd    | Co    | Cr    | Cu           | Fe           | Hg           | K     | Mg           | Mn    | Mo    | Na    | Ni    | Pb    | Sr    | Zn    |
|------|---|-------|-------|-------|-------|-------|-------|--------------|--------------|--------------|-------|--------------|-------|-------|-------|-------|-------|-------|-------|
| TOS  | r | -0.12 | -0.12 | 0.08  | -0.09 | -0.03 | -0.13 | 0.63         | -0.04        | -0.32        | -0.02 | 0.52         | 0.11  | -0.26 | -0.04 | -0.24 | -0.12 | -0.19 | -0.11 |
|      | p | 0.658 | 0.659 | 0.769 | 0.750 | 0.917 | 0.633 | <b>0.008</b> | 0.897        | 0.309        | 0.935 | <b>0.039</b> | 0.681 | 0.336 | 0.883 | 0.366 | 0.667 | 0.479 | 0.684 |
| FRAP | r | -0.18 | -0.18 | 0.08  | -0.25 | -0.12 | -0.17 | -0.14        | 0.02         | 0.26         | -0.15 | -0.21        | 0.00  | -0.09 | 0.20  | -0.05 | -0.16 | -0.21 | 0.33  |
|      | p | 0.496 | 0.480 | 0.765 | 0.334 | 0.651 | 0.509 | 0.590        | 0.950        | 0.385        | 0.574 | 0.419        | 0.993 | 0.737 | 0.431 | 0.840 | 0.527 | 0.410 | 0.202 |
| SOD  | r | -0.20 | -0.19 | 0.09  | -0.22 | -0.14 | -0.18 | 0.13         | 0.01         | 0.33         | -0.31 | 0.28         | -0.02 | -0.36 | 0.33  | -0.08 | -0.18 | -0.25 | -0.03 |
|      | p | 0.441 | 0.461 | 0.732 | 0.393 | 0.593 | 0.484 | 0.613        | 0.972        | 0.276        | 0.222 | 0.280        | 0.942 | 0.154 | 0.202 | 0.761 | 0.500 | 0.333 | 0.901 |
| GPx  | r | -0.42 | -0.39 | -0.25 | -0.36 | -0.45 | -0.41 | -0.24        | -0.53        | -0.61        | -0.27 | -0.21        | -0.31 | -0.28 | 0.10  | -0.08 | -0.42 | -0.39 | -0.13 |
|      | p | 0.093 | 0.125 | 0.328 | 0.151 | 0.072 | 0.100 | 0.355        | <b>0.028</b> | <b>0.027</b> | 0.297 | 0.419        | 0.231 | 0.270 | 0.698 | 0.764 | 0.096 | 0.120 | 0.610 |
| MDA  | r | 0.05  | 0.10  | 0.20  | -0.03 | 0.10  | 0.06  | 0.14         | -0.02        | 0.35         | -0.33 | -0.04        | -0.42 | 0.20  | 0.21  | 0.37  | 0.06  | 0.16  | -0.16 |
|      | p | 0.861 | 0.716 | 0.458 | 0.915 | 0.701 | 0.828 | 0.600        | 0.949        | 0.272        | 0.208 | 0.893        | 0.109 | 0.467 | 0.434 | 0.156 | 0.837 | 0.566 | 0.559 |

Numbers in bold represent the significant correlations.

**Table S2.** Correlations: markers of OS vs chemical elements.

|               |   | TOS   | FRAP  | SOD   | GPx   | MDA   | TP    | Alb   | Chol         | TAG   | Al    | Ba    | Ca           | Cd    | Co    | Cu    | Fe           | Hg    | K     | Mg           | Mn    | Mo    | Na    | Ni    | Pb    | Sr    | Zn           |
|---------------|---|-------|-------|-------|-------|-------|-------|-------|--------------|-------|-------|-------|--------------|-------|-------|-------|--------------|-------|-------|--------------|-------|-------|-------|-------|-------|-------|--------------|
| Concentration | r | 0.18  | -0.04 | -0.14 | 0.16  | 0.02  | -0.03 | 0.03  | 0.12         | 0.21  | 0.05  | 0.04  | -0.11        | 0.08  | 0.08  | 0.05  | -0.17        | 0.02  | -0.49 | -0.29        | -0.31 | 0.17  | -0.02 | 0.18  | 0.09  | 0.03  | 0.03         |
|               | p | 0.505 | 0.873 | 0.590 | 0.546 | 0.939 | 0.897 | 0.904 | 0.627        | 0.422 | 0.845 | 0.877 | 0.678        | 0.751 | 0.740 | 0.856 | 0.491        | 0.932 | 0.074 | 0.248        | 0.205 | 0.502 | 0.923 | 0.484 | 0.719 | 0.896 | 0.905        |
| MOT_0         | r | 0.12  | 0.28  | 0.28  | -0.21 | 0.27  | -0.30 | -0.11 | -0.59        | -0.24 | 0.20  | 0.16  | 0.25         | 0.12  | 0.25  | 0.19  | 0.10         | -0.26 | 0.21  | -0.32        | 0.03  | 0.10  | 0.02  | 0.32  | -0.06 | 0.19  | 0.13         |
|               | p | 0.656 | 0.279 | 0.280 | 0.424 | 0.304 | 0.246 | 0.671 | <b>0.009</b> | 0.351 | 0.424 | 0.527 | 0.319        | 0.641 | 0.309 | 0.454 | 0.688        | 0.305 | 0.481 | 0.192        | 0.900 | 0.706 | 0.943 | 0.192 | 0.823 | 0.462 | 0.621        |
| MOT_1         | r | 0.08  | 0.02  | 0.10  | -0.34 | 0.05  | -0.07 | 0.25  | -0.31        | 0.03  | -0.41 | -0.43 | 0.33         | -0.42 | -0.32 | -0.41 | 0.27         | 0.48  | 0.29  | -0.09        | 0.09  | -0.37 | -0.14 | 0.27  | 0.15  | -0.42 | -0.44        |
|               | p | 0.781 | 0.930 | 0.689 | 0.181 | 0.840 | 0.776 | 0.330 | 0.214        | 0.898 | 0.092 | 0.073 | 0.184        | 0.080 | 0.188 | 0.087 | <b>0.043</b> | 0.275 | 0.323 | 0.731        | 0.717 | 0.129 | 0.585 | 0.287 | 0.564 | 0.083 | 0.071        |
| PRO_0         | r | 0.16  | 0.22  | 0.26  | -0.17 | 0.30  | -0.28 | -0.11 | -0.50        | -0.21 | 0.24  | 0.21  | 0.16         | 0.17  | 0.30  | 0.23  | 0.09         | -0.30 | 0.15  | -0.39        | 0.05  | 0.15  | -0.03 | 0.37  | -0.12 | 0.23  | 0.18         |
|               | p | 0.543 | 0.399 | 0.322 | 0.519 | 0.265 | 0.268 | 0.687 | <b>0.033</b> | 0.428 | 0.328 | 0.401 | 0.524        | 0.506 | 0.235 | 0.348 | 0.734        | 0.224 | 0.604 | 0.107        | 0.831 | 0.540 | 0.913 | 0.129 | 0.637 | 0.355 | 0.476        |
| PRO_1         | r | 0.10  | 0.05  | 0.12  | -0.31 | 0.09  | -0.11 | 0.23  | -0.30        | 0.05  | -0.43 | -0.45 | 0.33         | -0.44 | -0.34 | -0.43 | 0.27         | 0.47  | 0.29  | -0.10        | 0.07  | -0.39 | -0.15 | 0.29  | 0.14  | -0.44 | -0.45        |
|               | p | 0.723 | 0.848 | 0.634 | 0.225 | 0.733 | 0.687 | 0.373 | 0.223        | 0.845 | 0.076 | 0.062 | 0.188        | 0.065 | 0.168 | 0.073 | <b>0.046</b> | 0.274 | 0.316 | 0.679        | 0.771 | 0.106 | 0.564 | 0.236 | 0.567 | 0.070 | 0.062        |
| VCL_0         | r | 0.04  | -0.25 | 0.22  | -0.26 | 0.08  | 0.07  | 0.20  | -0.03        | -0.18 | 0.19  | 0.15  | 0.12         | 0.25  | 0.15  | 0.19  | 0.00         | -0.19 | 0.48  | -0.12        | 0.53  | 0.19  | -0.27 | 0.09  | -0.22 | 0.19  | 0.16         |
|               | p | 0.869 | 0.337 | 0.390 | 0.321 | 0.780 | 0.783 | 0.449 | 0.902        | 0.479 | 0.458 | 0.547 | 0.637        | 0.325 | 0.555 | 0.455 | 0.985        | 0.460 | 0.081 | <b>0.024</b> | 0.622 | 0.438 | 0.274 | 0.721 | 0.388 | 0.443 | <b>0.049</b> |
| VCL_1         | r | 0.40  | 0.16  | 0.47  | 0.10  | 0.40  | -0.31 | -0.05 | -0.02        | 0.15  | 0.18  | 0.17  | 0.11         | 0.17  | 0.18  | 0.18  | 0.03         | -0.29 | 0.36  | -0.03        | 0.21  | 0.16  | -0.26 | 0.05  | -0.34 | 0.19  | 0.20         |
|               | p | 0.123 | 0.535 | 0.056 | 0.698 | 0.124 | 0.221 | 0.859 | 0.944        | 0.578 | 0.465 | 0.503 | 0.662        | 0.489 | 0.467 | 0.485 | 0.917        | 0.239 | 0.209 | 0.899        | 0.406 | 0.521 | 0.306 | 0.858 | 0.163 | 0.439 | <b>0.043</b> |
| BCF_0         | r | 0.09  | -0.14 | -0.14 | 0.20  | 0.16  | 0.11  | 0.07  | 0.35         | 0.34  | 0.04  | 0.06  | -0.13        | 0.05  | 0.02  | 0.04  | -0.02        | 0.06  | 0.14  | 0.11         | -0.06 | 0.04  | -0.08 | -0.15 | -0.15 | 0.05  | 0.12         |
|               | p | 0.732 | 0.591 | 0.605 | 0.440 | 0.546 | 0.683 | 0.791 | 0.151        | 0.184 | 0.888 | 0.813 | 0.611        | 0.843 | 0.952 | 0.887 | 0.939        | 0.801 | 0.632 | 0.661        | 0.822 | 0.873 | 0.744 | 0.555 | 0.556 | 0.857 | 0.648        |
| BCF_1         | r | 0.11  | -0.06 | -0.05 | 0.47  | 0.41  | 0.04  | -0.02 | 0.47         | 0.11  | 0.03  | 0.09  | -0.41        | 0.03  | 0.02  | 0.04  | -0.18        | -0.36 | -0.33 | -0.15        | 0.02  | -0.03 | -0.05 | -0.02 | -0.20 | 0.05  | 0.14         |
|               | p | 0.689 | 0.811 | 0.860 | 0.057 | 0.118 | 0.876 | 0.954 | <b>0.048</b> | 0.675 | 0.903 | 0.717 | 0.088        | 0.908 | 0.943 | 0.863 | 0.487        | 0.147 | 0.244 | 0.561        | 0.941 | 0.907 | 0.846 | 0.932 | 0.423 | 0.830 | 0.589        |
| ALH_0         | r | 0.09  | 0.05  | 0.28  | -0.20 | 0.01  | -0.13 | 0.04  | -0.36        | -0.31 | 0.17  | 0.13  | 0.26         | 0.20  | 0.18  | 0.17  | 0.06         | -0.27 | 0.17  | -0.16        | 0.37  | 0.16  | -0.09 | 0.14  | -0.05 | 0.17  | 0.09         |
|               | p | 0.727 | 0.861 | 0.274 | 0.435 | 0.958 | 0.620 | 0.866 | 0.141        | 0.227 | 0.490 | 0.610 | 0.303        | 0.429 | 0.465 | 0.498 | 0.823        | 0.287 | 0.571 | 0.525        | 0.133 | 0.516 | 0.708 | 0.569 | 0.856 | 0.508 | 0.733        |
| ALH_1         | r | 0.18  | 0.04  | 0.24  | -0.26 | -0.12 | -0.12 | 0.03  | -0.34        | 0.03  | 0.03  | -0.02 | 0.48         | 0.05  | 0.07  | 0.02  | 0.23         | 0.12  | 0.49  | 0.19         | 0.23  | 0.11  | -0.11 | 0.00  | -0.04 | 0.03  | -0.05        |
|               | p | 0.497 | 0.888 | 0.361 | 0.322 | 0.664 | 0.639 | 0.907 | 0.167        | 0.900 | 0.896 | 0.942 | <b>0.042</b> | 0.854 | 0.784 | 0.945 | 0.355        | 0.622 | 0.076 | 0.443        | 0.359 | 0.660 | 0.655 | 0.997 | 0.881 | 0.921 | 0.853        |
| MTT           | r | 0.21  | -0.02 | 0.26  | -0.18 | 0.44  | -0.13 | 0.11  | -0.05        | -0.20 | -0.04 | -0.03 | -0.07        | -0.03 | 0.04  | -0.04 | 0.22         | 0.25  | 0.12  | -0.01        | 0.53  | -0.06 | 0.01  | -0.13 | 0.20  | -0.04 | -0.03        |
|               | p | 0.461 | 0.950 | 0.357 | 0.530 | 0.119 | 0.656 | 0.704 | 0.854        | 0.467 | 0.870 | 0.898 | 0.807        | 0.911 | 0.881 | 0.893 | 0.407        | 0.348 | 0.708 | <b>0.034</b> | 0.975 | 0.827 | 0.976 | 0.638 | 0.457 | 0.878 | 0.912        |

Numbers in bold represent the significant correlations.
